# Supplementary material for: Detailed characterization of alterations in the lipid profiles during autophagic cell death of leukemia cells
Source: Royal Society of Chemistry journal article supplement (doi:10.1039/c6ra01965j), 2016-01-01

## Detailed characterization of alterations in lipid profiles during autophagic cell death of leukemia cells

Jae Won Lee<sup>a,b</sup>, Haruka Shinohara<sup>c</sup>, Jae Hun Jung<sup>a</sup>, Hyuck Jun Mok<sup>a</sup>, Yukihiro Akao<sup>c</sup>, and Kwang Pyo Kim<sup>\*a,d</sup>

<sup>a</sup> *Department of Applied Chemistry, College of Applied Science, Kyung Hee University, Yongin, 446-701, Republic of Korea.*

<sup>b</sup> *Department of Herbal Crop Research, National Institute of Horticultural and Herbal Science, RDA, Eumseong 369-873, Republic of Korea.*

<sup>c</sup> *United Graduate School of Drug Discovery and Medical Information Sciences, Gifu University, 1-1 Yanagido, Gifu 501-1193, Japan.*

<sup>d</sup> *The Institute of Natural Science, College of Applied Science, Kyung Hee University, Yongin, 446-701, Republic of Korea.*

**Table S1.** Optimized MRM conditions for 23 lipids

| Lipids           | Ion mode | MRM transitions                | MS/MS CE (eV) |
|------------------|----------|--------------------------------|---------------|
| TG               | Positive | $[M+NH_4] > [M+NH_4-RCOONH_4]$ | 18            |
| DG               | Positive | $[M+NH_4] > [M+NH_4-35]$       | 8             |
| ChE              | Positive | $[M+NH_4] > 369$               | 8             |
| PC               | Positive | $[M+H] > 184$                  | 26            |
| PE               | Positive | $[M+H] > [M+H-141]$            | 14            |
| PG               | Positive | $[M+NH_4] > [M+NH_4-189]$      | 14            |
| LPC              | Positive | $[M+H] > 184$                  | 30            |
| LPE              | Positive | $[M+H] > [M+H-141]$            | 18            |
| LPG              | Positive | $[M+H] > [M+H-172]$            | 14            |
| SM               | Positive | $[M+H] > 184$                  | 30            |
| Cer              | Positive | $[M+H] > 264$                  | 26            |
| dCer             | Positive | $[M+H] > 266$                  | 26            |
| So               | Positive | $[M+H] > [M+H-18]$             | 10            |
| Sa               | Positive | $[M+H] > [M+H-18]$             | 10            |
| Methylated PS    | Positive | $[M+H] > [M+H-213]$            | 20            |
| Methylated PI    | Positive | $[M+H] > [M+H-274]$            | 10            |
| Methylated PA    | Positive | $[M+H] > [M+H-126]$            | 0             |
| Methylated LPS   | Positive | $[M+H] > [M+H-213]$            | 20            |
| Methylated LPI   | Positive | $[M+H] > [M+H-274]$            | 12            |
| Methylated LPA   | Positive | $[M+H] > [M+H-126]$            | 14            |
| Methylated Cer1P | Positive | $[M+H] > 264$                  | 28            |
| Methylated So1P  | Positive | $[M+H] > 264$                  | 12            |
| Methylated Sa1P  | Positive | $[M+H] > 266$                  | 20            |

**Table S2.** Validation of analysis of 23 lipids based on MRM and the LODs of each lipid standard

| Lipids <sup>a)</sup> | RT <sup>b)</sup><br>(min) | RSD (n=6) (%) <sup>c)</sup> |                         | Correlation<br>( <i>R</i> <sup>2</sup> ) | Linear range<br>(pg) | LOD<br>(pg) |
|----------------------|---------------------------|-----------------------------|-------------------------|------------------------------------------|----------------------|-------------|
|                      |                           | RT <sup>d)</sup>            | Peak area <sup>e)</sup> |                                          |                      |             |
| TG                   | 3.47                      | 1.1                         | 5.7                     | 0.9992                                   | 0.1 – 2000           | 0.1         |
| DG                   | 1.46                      | 0.6                         | 5.4                     | 0.9986                                   | 0.2 – 2000           | 0.2         |
| ChE                  | 13.47                     | 0.8                         | 5.9                     | 0.9894                                   | 1000 – 50000         | 1000        |
| PC                   | 1.66                      | 1.1                         | 4.9                     | 0.9912                                   | 0.1 – 2000           | 0.1         |
| PE                   | 1.62                      | 1.3                         | 5.8                     | 0.9954                                   | 0.2 – 2000           | 0.2         |
| PG                   | 1.46                      | 0.8                         | 8.9                     | 0.9992                                   | 10 – 2000            | 10          |
| LPC                  | 1.36                      | 1.0                         | 4.8                     | 0.9873                                   | 1 – 2000             | 1           |
| LPE                  | 1.38                      | 1.2                         | 5.7                     | 0.9899                                   | 2 – 2000             | 2           |
| LPG                  | 1.27                      | 0.9                         | 3.5                     | 0.9963                                   | 2 – 2000             | 2           |
| SM                   | 2.99                      | 1.0                         | 5.5                     | 0.9956                                   | 1 – 2000             | 1           |
| Cer                  | 3.07                      | 1.0                         | 6.3                     | 0.9962                                   | 1 – 2000             | 1           |
| dCer                 | 3.33                      | 1.5                         | 6.9                     | 0.9984                                   | 1 – 2000             | 1           |
| So                   | 1.34                      | 0.9                         | 3.4                     | 0.9803                                   | 10 – 2000            | 10          |
| Sa                   | 1.40                      | 1.4                         | 4.2                     | 0.9984                                   | 10 – 2000            | 10          |
| Methylated PS        | 1.88                      | 0.2                         | 4.2                     | 0.9872                                   | 1 – 2000             | 1           |
| Methylated PI        | 1.33                      | 0.2                         | 6.2                     | 0.9954                                   | 100 – 50000          | 100         |
| Methylated PA        | 2.14                      | 0.3                         | 4.8                     | 0.9993                                   | 0.2 – 2000           | 0.2         |
| Methylated LPS       | 1.57                      | 0.2                         | 5.4                     | 0.9834                                   | 1 – 2000             | 1           |
| Methylated LPI       | 1.32                      | 0.2                         | 6.5                     | 0.9994                                   | 50 – 50000           | 50          |
| Methylated LPA       | 2.04                      | 0.8                         | 7.3                     | 0.9963                                   | 0.2 – 2000           | 0.2         |
| Methylated Cer1P     | 3.75                      | 0.2                         | 4.8                     | 0.9930                                   | 0.2 – 2000           | 0.2         |
| Methylated So1P      | 1.39                      | 0.1                         | 4.5                     | 0.9890                                   | 100 – 2000           | 100         |
| Methylated Sa1P      | 1.44                      | 0.2                         | 4.4                     | 0.9984                                   | 100 – 2000           | 100         |

a) Lipid standards used in this study were as follows: TG (11:1-11:1-11:1), DG (8:0-8:0), ChE (10:0), PC (10:0-10:0), PE (10:0-10:0), PG (10:0-10:0), LPC (13:0), LPE (14:0), LPG (14:0), SM (d18:1-12:0), Cer (d18:1-12:0), dCer (d18:1-12:0), So (d17:1), Sa (d17:0), PS (10:0-10:0), PI (8:0-8:0), PA (10:0-10:0), LPS (17:1), LPI (13:0), LPA (14:0), Cer1P (d18:1-12:0), So1P (d17:1), and Sa1P (d17:0).

b) Retention time

c) Relative standard deviation; the concentration of each lipid was 0.1 mg/mL.

d) Relative retention time (compound/internal standard)

e) Relative peak area (compound/internal standard)

**Table S3.** Various lipids analyzed by UPLC/QqQ-MS

| Lipids    | RT   | Lipids   | RT   | Lipids    | RT   | Lipids    | RT   |
|-----------|------|----------|------|-----------|------|-----------|------|
| TG(64:9)  | 21.2 | TG(56:2) | 20.2 | DG(34:3)  | 5.5  | PC(44:12) | 3.2  |
| TG(64:11) | 18.3 | TG(56:3) | 19.8 | DG(36:0)  | 12.4 | PC(42:1)  | 16.6 |
| TG(64:12) | 17.4 | TG(56:4) | 19.3 | DG(36:4)  | 5.5  | PC(42:2)  | 14.5 |
| TG(62:2)  | 21.2 | TG(56:5) | 19.1 | DG(36:5)  | 4.4  | PC(42:3)  | 12.2 |
| TG(62:3)  | 20.9 | TG(56:6) | 18.4 | DG(40:1)  | 14.8 | PC(42:4)  | 10.5 |
| TG(62:4)  | 20.6 | TG(56:7) | 18   | DG(40:2)  | 12.6 | PC(42:5)  | 8.8  |
| TG(62:6)  | 19.9 | TG(54:0) | 20.6 | DG(40:3)  | 11.3 | PC(42:6)  | 7.1  |
| TG(62:7)  | 19.6 | TG(54:1) | 20.2 | DG(40:4)  | 9.7  | PC(42:7)  | 6.4  |
| TG(62:8)  | 19.1 | TG(54:2) | 19.8 | DG(40:6)  | 6.3  | PC(42:8)  | 4.8  |
| TG(62:9)  | 18.5 | TG(54:3) | 19.3 | DG(40:7)  | 5.6  | PC(42:9)  | 4    |
| TG(62:10) | 17.9 | TG(54:4) | 18.8 | DG(42:11) | 2.2  | PC(42:10) | 3.6  |
| TG(62:11) | 17.4 | TG(54:5) | 18.5 | DG(42:3)  | 12.8 | PC(42:11) | 3    |
| TG(62:12) | 16.4 | TG(54:6) | 18   | DG(42:5)  | 9.8  | PC(40:1)  | 14.8 |
| TG(62:13) | 15.7 | TG(54:7) | 16.9 | DG(42:6)  | 8.2  | PC(40:2)  | 12.2 |
| TG(60:1)  | 21.2 | TG(52:0) | 20.3 | DG(42:5)  | 9.8  | PC(40:3)  | 10.2 |
| TG(60:2)  | 20.9 | TG(52:1) | 19.8 | DG(42:6)  | 8.2  | PC(40:4)  | 8.8  |
| TG(60:3)  | 20.6 | TG(52:2) | 19.3 | ChE(22:4) | 18.3 | PC(40:5)  | 7.1  |
| TG(60:4)  | 20.3 | TG(52:3) | 18.8 | ChE(22:6) | 16.6 | PC(40:6)  | 5.7  |
| TG(60:5)  | 19.9 | TG(52:4) | 18   | ChE(20:1) | 19.7 | PC(40:7)  | 4.9  |
| TG(60:6)  | 19.5 | TG(52:5) | 17.6 | ChE(20:3) | 18.2 | PC(40:8)  | 4    |
| TG(60:7)  | 19   | TG(52:6) | 16.2 | ChE(20:4) | 17.3 | PC(40:9)  | 3.3  |
| TG(60:8)  | 18.8 | TG(50:0) | 19.8 | ChE(20:5) | 16.1 | PC(38:1)  | 12.2 |
| TG(60:9)  | 18.2 | TG(50:1) | 19.3 | ChE(18:1) | 19   | PC(38:2)  | 9.8  |
| TG(60:10) | 17.4 | TG(50:2) | 18.8 | ChE(18:2) | 18.2 | PC(38:3)  | 8.4  |
| TG(60:11) | 16.3 | TG(50:3) | 18.1 | ChE(18:3) | 17   | PC(38:4)  | 7.3  |
| TG(60:12) | 15.7 | TG(48:0) | 19.3 | ChE(16:0) | 18.9 | PC(38:5)  | 5.5  |
| TG(58:0)  | 21.3 | TG(48:1) | 18.8 | ChE(16:1) | 18   | PC(38:6)  | 4.9  |
| TG(58:1)  | 20.9 | TG(48:2) | 18   | PC(46:6)  | 11.6 | PC(38:7)  | 3.8  |
| TG(58:2)  | 20.6 | TG(48:8) | 7.9  | PC(46:7)  | 9.2  | PC(36:1)  | 10   |
| TG(58:3)  | 20.2 | TG(46:0) | 18.7 | PC(44:2)  | 16.8 | PC(36:2)  | 7.9  |
| TG(58:4)  | 19.9 | TG(46:1) | 17.9 | PC(44:3)  | 14.5 | PC(36:3)  | 6.2  |
| TG(58:5)  | 19.5 | TG(46:2) | 17   | PC(44:4)  | 12.9 | PC(36:4)  | 5.6  |
| TG(58:6)  | 19   | TG(44:0) | 17.9 | PC(44:5)  | 10.8 | PC(36:5)  | 4.6  |
| TG(58:7)  | 18.7 | TG(44:1) | 16.9 | PC(44:6)  | 9.2  | PC(36:6)  | 3.8  |
| TG(58:8)  | 18   | DG(34:0) | 10.5 | PC(44:7)  | 7.7  | PC(36:7)  | 3.5  |
| TG(56:0)  | 21   | DG(34:1) | 9.1  | PC(44:8)  | 6.1  | PC(34:0)  | 10.2 |
| TG(56:1)  | 20.6 | DG(34:2) | 6.8  | PC(44:10) | 4.3  | PC(34:1)  | 7.8  |

**Table S3.** Continued

| Lipids    | RT   | Lipids   | RT   | Lipids   | RT   | Lipids    | RT   |
|-----------|------|----------|------|----------|------|-----------|------|
| PC(34:2)  | 6.2  | PE(36:0) | 10.8 | PS(32:1) | 6    | PI(32:1)  | 18.7 |
| PC(34:3)  | 5    | PE(36:1) | 8.8  | PS(30:0) | 6.2  | PI(32:2)  | 18.1 |
| PC(34:4)  | 4.2  | PE(36:2) | 7    | PS(28:0) | 5.3  | PI(30:0)  | 18.7 |
| PC(34:5)  | 3.6  | PE(36:3) | 5.4  | PG(30:0) | 4.1  | PI(30:1)  | 18   |
| PC(32:0)  | 8.4  | PE(36:4) | 4.9  | PG(32:0) | 5.3  | PI(30:2)  | 16.9 |
| PC(32:1)  | 6.4  | PE(36:5) | 4    | PG(32:1) | 4.1  | PI(28:0)  | 17.8 |
| PC(32:2)  | 5.2  | PE(34:0) | 8.8  | PG(34:0) | 6.9  | PA(42:5)  | 12.5 |
| PC(32:3)  | 4.4  | PE(34:1) | 6.9  | PG(34:1) | 5.3  | PA(42:6)  | 11.3 |
| PC(30:1)  | 6.6  | PE(34:2) | 5.4  | PG(34:2) | 4.1  | PA(42:7)  | 9.6  |
| PC(30:2)  | 5.3  | PE(34:3) | 4.6  | PG(34:3) | 3.3  | PA(42:8)  | 8.1  |
| PC(28:0)  | 7.3  | PE(30:0) | 5.2  | PG(36:0) | 8.8  | PA(42:9)  | 7.3  |
| PC(28:1)  | 5.5  | PS(42:2) | 13.2 | PG(36:1) | 6.9  | PA(42:10) | 5.5  |
| PE(42:1)  | 14.7 | PS(42:3) | 11.4 | PG(36:2) | 5.4  | PA(40:4)  | 12.5 |
| PE(42:2)  | 12.8 | PS(42:4) | 10   | PG(36:3) | 4.3  | PA(40:5)  | 10.6 |
| PE(42:3)  | 10.9 | PS(42:5) | 8.5  | PG(36:4) | 3.9  | PA(40:6)  | 9.2  |
| PE(42:4)  | 9.5  | PS(42:6) | 7.1  | PG(38:1) | 8.9  | PA(38:1)  | 15.1 |
| PE(42:5)  | 8    | PS(42:7) | 6.2  | PG(38:2) | 7.1  | PA(38:2)  | 13.6 |
| PE(42:6)  | 6.2  | PS(40:1) | 13.2 | PG(38:3) | 5.8  | PA(38:3)  | 12.4 |
| PE(42:7)  | 5.4  | PS(40:2) | 11.3 | PG(38:4) | 4.6  | PA(38:4)  | 10.6 |
| PE(42:8)  | 4.5  | PS(40:3) | 10   | PG(38:5) | 3.8  | PA(38:5)  | 8.7  |
| PE(42:9)  | 3.4  | PS(40:4) | 8.4  | PG(38:6) | 3.5  | PA(38:6)  | 7    |
| PE(42:10) | 3.2  | PS(40:5) | 6.9  | PG(40:5) | 4.7  | PA(38:7)  | 6.2  |
| PE(40:1)  | 12.8 | PS(40:6) | 6.2  | PG(40:6) | 4.5  | PA(36:1)  | 13.3 |
| PE(40:2)  | 10.8 | PS(40:7) | 4.7  | PG(40:7) | 3.5  | PA(36:2)  | 11.5 |
| PE(40:3)  | 9.3  | PS(38:1) | 11.3 | PI(38:0) | 20.6 | PA(36:3)  | 10.5 |
| PE(40:4)  | 7.8  | PS(38:2) | 9.4  | PI(38:1) | 20.2 | PA(36:4)  | 8.6  |
| PE(40:5)  | 6.4  | PS(38:3) | 8    | PI(38:2) | 19.8 | PA(34:0)  | 10.5 |
| PE(40:6)  | 5.7  | PS(38:4) | 7.3  | PI(38:3) | 19.4 | PA(34:1)  | 8.6  |
| PE(40:7)  | 4.2  | PS(38:5) | 5.6  | PI(36:0) | 20.2 | PA(34:2)  | 6.8  |
| PE(40:8)  | 3.6  | PS(38:6) | 4.5  | PI(36:1) | 19.8 | PA(32:0)  | 8.6  |
| PE(38:1)  | 10.8 | PS(36:1) | 9.3  | PI(36:2) | 19.3 | PA(32:1)  | 6.8  |
| PE(38:2)  | 8.9  | PS(36:2) | 7.5  | PI(36:3) | 18.7 | PA(32:2)  | 6.1  |
| PE(38:3)  | 7.6  | PS(36:3) | 6.1  | PI(36:4) | 17.9 | PA(32:3)  | 4.9  |
| PE(38:4)  | 6.5  | PS(34:0) | 9.2  | PI(34:0) | 19.8 | PA(30:0)  | 6.2  |
| PE(38:5)  | 5    | PS(34:1) | 7.4  | PI(34:1) | 19.3 | PA(30:1)  | 5.1  |
| PE(38:6)  | 4.4  | PS(34:2) | 5.9  | PI(34:2) | 18.6 | PA(30:2)  | 4.3  |
| PE(38:7)  | 3.3  | PS(32:0) | 7.3  | PI(32:0) | 19.3 | PA(28:0)  | 4.7  |

**Table S3.** Continued

| Lipids    | RT   | Lipids    | RT   | Lipids          | RT   | Lipids            | RT   |
|-----------|------|-----------|------|-----------------|------|-------------------|------|
| PA(28:1)  | 4.2  | LPE(22:4) | 1.57 | LPA(20:5)       | 1.27 | Cer(d18:1-16:0)   | 5.8  |
| PA(28:2)  | 3.4  | LPE(22:6) | 1.38 | LPA(18:0)       | 2.15 | Cer(d18:1-18:0)   | 7.6  |
| LPC(14:0) | 1.56 | LPS(18:0) | 2    | LPA(18:1)       | 1.83 | Cer(d18:1-20:0)   | 9.6  |
| LPC(16:0) | 1.88 | LPS(18:1) | 1.69 | LPA(18:2)       | 1.59 | Cer(d18:1-20:1)   | 7.6  |
| LPC(16:1) | 1.63 | LPG(16:0) | 1.45 | LPA(18:3)       | 1.29 | Cer(d18:1-22:0)   | 11.7 |
| LPC(18:0) | 2.3  | LPG(18:1) | 1.47 | LPA(16:0)       | 1.82 | Cer(d18:1-22:1)   | 9.6  |
| LPC(18:1) | 1.8  | LPG(20:1) | 1.79 | LPA(16:1)       | 1.56 | Cer(d18:1-24:0)   | 13.7 |
| LPC(18:2) | 1.69 | LPG(20:4) | 1.36 | SM(d18:1-24:0)  | 14.9 | Cer(d18:1-24:1)   | 11.7 |
| LPC(18:3) | 1.57 | LPG(20:5) | 1.26 | SM(d18:1-24:1)  | 12.6 | dCer(d18:0-24:0)  | 13.6 |
| LPC(20:1) | 1.79 | LPG(22:6) | 1.28 | SM(d18:1-22:0)  | 7.8  | dCer(d18:0-24:1)  | 11.7 |
| LPC(20:3) | 1.69 | LPI(22:4) | 1.48 | SM(d18:1-22:1)  | 6.4  | dCer(d18:0-16:0)  | 5.8  |
| LPC(20:4) | 1.53 | LPI(22:6) | 1.47 | SM(d18:1-22:4)  | 3.7  | Cer1P(d18:1-24:0) | 13.3 |
| LPC(20:5) | 1.4  | LPI(20:4) | 1.45 | SM(d18:1-20:0)  | 9.8  | Cer1P(d18:1-24:1) | 11.4 |
| LPC(22:4) | 1.56 | LPI(18:1) | 1.47 | SM(d18:1-20:1)  | 8    | Cer1P(d18:1-22:0) | 11.5 |
| LPC(22:6) | 1.5  | LPI(18:2) | 1.3  | SM(d18:1-20:3)  | 5.6  | Cer1P(d14:1-24:1) | 9.3  |
| LPC(24:0) | 2.1  | LPI(16:0) | 1.44 | SM(d18:1-20:4)  | 3.7  | Cer1P(d18:1-18:0) | 7.3  |
| LPC(24:1) | 1.9  | LPA(24:0) | 4.23 | SM(d18:1-18:0)  | 8.1  | Cer1P(d18:1-16:0) | 5.6  |
| LPE(16:0) | 1.62 | LPA(24:1) | 3.33 | SM(d18:1-18:1)  | 6.3  | Cer1P(d18:1-14:0) | 4.3  |
| LPE(16:1) | 1.46 | LPA(22:0) | 3.29 | SM(d18:1-18:2)  | 4.8  | So(d16:1)         | 1.2  |
| LPE(18:0) | 1.94 | LPA(22:1) | 2.66 | SM(d18:1-16:0)  | 6.3  | So(d14:1)         | 1.16 |
| LPE(18:1) | 1.64 | LPA(22:4) | 1.65 | SM(d18:1-16:1)  | 5    | Sa(d18:0)         | 1.62 |
| LPE(18:2) | 1.48 | LPA(22:6) | 1.49 | Cer(d16:1-16:0) | 4.4  | So1P(d18:1)       | 1.43 |
| LPE(20:1) | 1.65 | LPA(20:0) | 2.63 | Cer(d16:1-22:0) | 9.7  | Sa1P(d18:0)       | 1.49 |
| LPE(20:3) | 1.54 | LPA(20:1) | 2.18 | Cer(d16:1-24:0) | 11.8 |                   |      |
| LPE(20:4) | 1.42 | LPA(20:3) | 1.61 | Cer(d16:1-24:1) | 9.7  |                   |      |
| LPE(20:5) | 1.34 | LPA(20:4) | 1.54 | Cer(d18:1-14:0) | 4.4  |                   |      |

**Figure S1.** Total ion chromatogram of various lipids in cancer cells

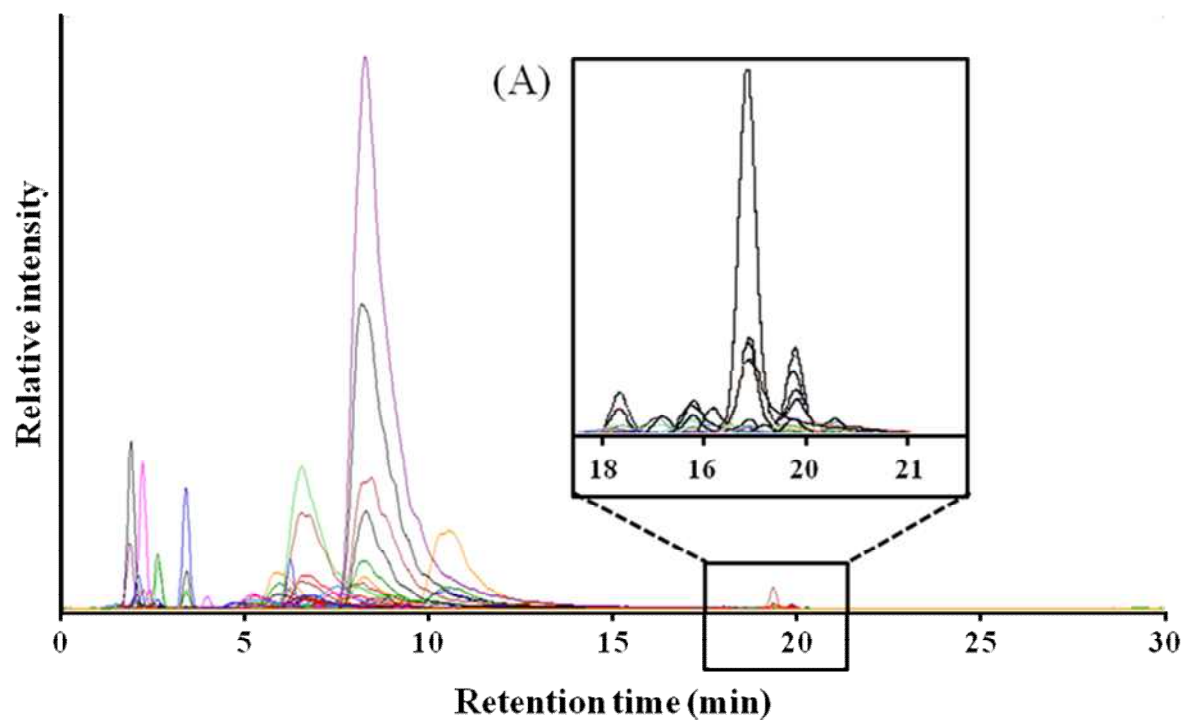

Supplement: c6ra01965j1.pdf [file c6ra01965j1.pdf]
